# Supplementary material for: Top-down estimates of anthropogenic VOC emissions in South Korea using formaldehyde vertical column densities from aircraft during the KORUS-AQ campaign
Source: Oxford University Press journal article supplement (doi:10.1525/elementa.2021.00109), 2021-01-01
Supplement: supplements_v1.3.docx [file supplements_v1.3.docx]

Supplemental material

Top-down estimates of anthropogenic VOC emissions in South Korea using formaldehyde vertical measurements from aircraft during the KORUS-AQ campaign

Hyeong-Ahn Kwon1, Rokjin J. Park1*, Yujin J. Oak1, Caroline R. Nowlan2, Scott J. Janz3, Matthew G. Kowalewski3, Alan Fried4, James Walega4, Kelvin H. Bates5, Jinkyul Choi4, Donald R. Blake6, Armin Wisthaler7, 8, and Jung-Hun Woo9

1School of Earth and Environmental Science, Seoul National University, Seoul, Republic of Korea

2Atomic and Molecular Physics Division, Harvard-Smithsonian Center for Astrophysics, Cambridge, MA, USA

3Atmospheric Chemistry and Dynamics Laboratory, NASA Goddard Space Flight Center, Greenbelt, MD, USA

4Institute for Arctic and Alpine Research, University of Colorado, Boulder, CO, USA

5John A. Paulson School of Engineering and Applied Sciences, Harvard University, Cambridge, MA, USA

6Department of Chemistry, University of California at Irvine, Irvine, CA, USA

7Department of Chemistry, University of Oslo, Oslo, Norway

8Institute for Ion Physics and Applied Physics, University of Innsbruck, Innsbruck, Austria

9Department of Advanced Technology Fusion, Konkuk University, Seoul, Republic of Korea

*Corresponding author’s email: Rokjin J. Park (rjpark@snu.ac.kr)

**List of Contents:**

**Tables:**

**Table S1. Limit of detection, precision, and accuracy for VOC measurements used in this study.**

**Table S2. VOC speciation of KORUS v5 and GEOS-Chem, KORUS v5 emissions in South Korea, and the VOC species used in top-down emission estimates.**

Table S3. Chemical species for ethene chemistry in GEOS-Chem.

Table S4. Added kinetic and photolysis reactions for ethene chemistry in GEOS-Chem.

Table S5. The one-day HCHO yields per carbon for VOC species used for top-down estimates.

**Figures:**

**Figure S1. Spatial distributions of VOC species in DC-8 observations below 2 km.**

**Figure S2. Spatial distributions of VOC species in the model using the bottom-up inventory below 2km.**

**Figure S3. Differences between the model and DC-8 (Fig. S2 – Fig. S1) below 2 km.**

Table S1. Limit of detection, precision, and accuracy for VOC measurements used in this study.

| **Measurement** | **Species** | | **LOD (pptv)** | **Precision (%)** | **Accuracy (%)** | **Reference** |
| --- | --- | --- | --- | --- | --- | --- |
| CAMS | HCHO | | 28–80 | 28–80 pptv | 6 | Fried et al. (2020) |
| WAS | Aromatics | Benzene | 3 | 3 | 3 | Simpson et al. (2020) |
| Toluene |
| m/p Xylene |
| o-Xylene |
| Alkanes | Ethane | 3 | 1 | 5 | Simpson et al. (2020) |
| Propane | 3 | 2 | 5 | Simpson et al. (2020) |
| n-Butane | 3 | 3 | 5 | Simpson et al. (2020) |
| i-Butane |
| n-Pentane |
| i-Pentane |
| n-Heptane |
| n-Octane |
| n-Nonane |
| n-Decane |
| Alkenes | Ethene | 3 | 3 | 5 | Simpson et al. (2020) |
| Propene |
| 1-Butene |
| cis-2-Butene |
| trans-2-Butene |
| i-Butene |
| PTR-MS (1 Hz) | Acetaldehyde | | 85 | 122 pptva | 10 | Simpson et al. (2020) |
| Acetone | | 50 | 90 pptva | 20 |  |
| Methyl Ethyl Ketone (MEK) | | 32 | 87 pptva | 10 | Simpson et al. (2020) |
| Isoprene | | 50 | 350 pptva | 10 |  |
| Methanol | | 315 | 418 pptva | 10 | Simpson et al. (2020) |

a The precision is estimated at 3 ppbv.

**Table S2. VOC speciation of KORUS v5 and GEOS-Chem, KORUS v5 emissions in South Korea, and the VOC species used in top-down emission estimates.**

| **Species** | **KORUS v5 inventory** | **Emission (moles s-1)** | **GEOS-Chem** | **Use in top-down estimates**c |
| --- | --- | --- | --- | --- |
| Acetone | ACET | 1.6 | ACET | O |
| Alkanes, kOHa < 500 | ALK1 | 32 | Ethane (C2H6) | O |
| Alkanes, 500 < kOH < 2500 | ALK2 | 28 | Propane (C3H8) | O |
| Alkanes, 2500 < kOH < 5000 | ALK3 | 15 | ≥ C4 alkanes (ALK4) | O |
| Alkanes, 5000 < kOH < 10000 | ALK4 | 35 | ≥ C4 alkanes (ALK4) | O |
| Alkanes, kOH > 10000 | ALK5 | 37 | ≥ C4 alkanes (ALK4) | O |
| Aromatics, kOH < 2 × 104 | ARO1 | 101 | Benzeneb  Tolueneb | O |
| Aromatics, kOH > 2 × 104 | ARO2 | 43 | Xylene (XYLE) | O |
| Acetaldehyde | CCHO | 3.7 | ALD2 | O |
| Ethene | ETHE | 76 | C2H4 | O |
| Glyoxal | GLY | 0.92 | GLYX |  |
| Formaldehyde | HCHO | 9.7 | HCHO | O |
| Isoprene | ISOP | 1.7 | ISOP | O |
| Methacrolein | MACR | 0.17 | MACR |  |
| Methyl ethyl ketone | MEK | 2.2 | MEK | O |
| Methanol | MEOH | 2.9 | MOH | O |
| Methylglyoxyal | MGLY | 0.35 | MGLY |  |
| Methylvinylketone | MVK | 0.015 | MVK |  |
| Alkenes, kOH < 7 × 104 | OLE1 | 24 | ≥ C3 alkenes (PRPE) | O |
| Alkenes, kOH > 7 × 104 | OLE2 | 26 | ≥ C3 alkenes (PRPE) | O |
| ≥ C3 aldehyde | RCHO | 1.4 | RCHO |  |
| Phenol | PHEN | 0.10 |  |  |
| Cresols | CRES | 0.26 |  |  |
| Terpenes | TERP | 0.065 |  |  |
| Biacetyl | BACL | 0.1 |  |  |
| Aromatic aldehyde | BALD | 0.093 |  |  |
| Ketones (kOH > 0.73 × 104) | PRD2 | 0.27 |  |  |
| Other unsaturated aldehydes | IPRD | 0.053 |  |  |

a unit is ppm-1 min-1

b Benzene emissions are 0.07 times ARO1, and toluene emissions are 0.7 times ARO1.

c “O” indicates species used in top-down estimates.

Table S3. Chemical species for ethene chemistry in GEOS-Chem.

| **Species** | **Description** |
| --- | --- |
| C2H4 | Ethene (ethylene) |
| CH2OO | Criegee intermediate |
| ETOO | Hydroxy-peroxy radical, formed from ethene + OH |
| ETO | Hydroxy-alkoxy radical, formed from ethene + OH |
| ETHP | Stable hydroxy-hydroperoxy-ethane |
| ETHN | Stable hydroxy-nitrooxy-ethane |
| GLYC | Glycolaldehyde |
| CH3OOH | Methylhydroperoxide |

Table S4. Added kinetic and photolysis reactions for ethene chemistry in GEOS-Chem†.

| **Reactant** |  | **Product(s)** | **Rate**a |
| --- | --- | --- | --- |
| **Ozone reaction** |  |  |  |
| C2H4 + O3 |  | HCHO + CH2OO | GCARR(9.10E-15, 0.0E+00, -2580.0) |
| **OH reaction** |  |  |  |
| C2H4 + OH |  | ETOO | GCJPLPR(1.10E-28, 3.5E+00, 0.0, 8.4E-12, 1.75, 0.0, 0.5, 0.0, 0.0) |
| ETOO + HO2 |  | ETHP | GCARR(1.53E-13, 0.0E+00, 1300.0) |
| ETOO + NO |  | 0.995ETO + 0.995NO2 + 0.005ETHN | GCARR(2.7E-12, 0.0E+00, 360.0) |
| ETOO + NO3 |  | ETO + NO2 | 2.30E-12 |
| ETOO + MO2 |  | 0.6ETO + 0.6HO2 + 0.8HCHO + 0.2MOH + 0.2ETHP + 0.2GLYC | 6.00E-13 |
| ETO |  | HO2 + 2HCHO | GCARR(9.5E-13, 0.0E+00, -5988.0) |
| ETO + O2 |  | GLYC + HO2 | GCARR(2.5E-14, 0.0E+00, -300.0) |
| ETHN + OH |  | GLYC + NO2 | 8.40E-13 |
| ETHP + OH |  | ETOO | GCARR(1.90E-12, 0.0E+00, 190.0) |
| ETHP + OH |  | OH + GLYC | 1.38E-11 |
| ETHP + |  | ETO + OH | CH3OOH photolysis rate |

†Please see the GEOS-Chem website (<http://wiki.seas.harvard.edu/geos-chem/index.php/GEOS-Chem_chemistry_mechanisms>) for rate formula descriptions and additional reactions not listed here.

a GEOS-Chem reaction rate functions (cm3 molecules-1 s-1 or s-1) and photolysis rate (s-1).

Table S5. The one-day HCHO yields per carbon for VOC species used for top-down estimates.

| **Species** | **HCHO yields per carbon** | **References** |
| --- | --- | --- |
| Acetone (ACET) | 0.037 | Stavrakou et al. (2009) |
| Ethane (C2H6) | 0.05 | Dufour et al. (2009) |
| Propane (C3H8) | 0.01 | Stavrakou et al. (2009) |
| ≥ C4 alkanes (ALK4) | 0.15 | Dufour et al. (2009) |
| Toluene (TOLU) | 0.17 | Zhu et al. (2014) |
| Xylene (XYLE) | 0.23 | Dufour et al. (2009) |
| Acetaldehyde (ALD2) | 0.49 | Dufour et al. (2009) |
| Ethene (C2H4) | 0.83 | Dufour et al. (2009) |
| Isoprene (ISOP) | 0.47 | Dufour et al. (2009) |
| Methyl ethyl ketone (MEK) | 0.22 | Dufour et al. (2009) |
| Methanol (MOH) | 0.38 | Dufour et al. (2009) |
| ≥ C3 alkenes (PRPE) | 0.61 | Dufour et al. (2009) |


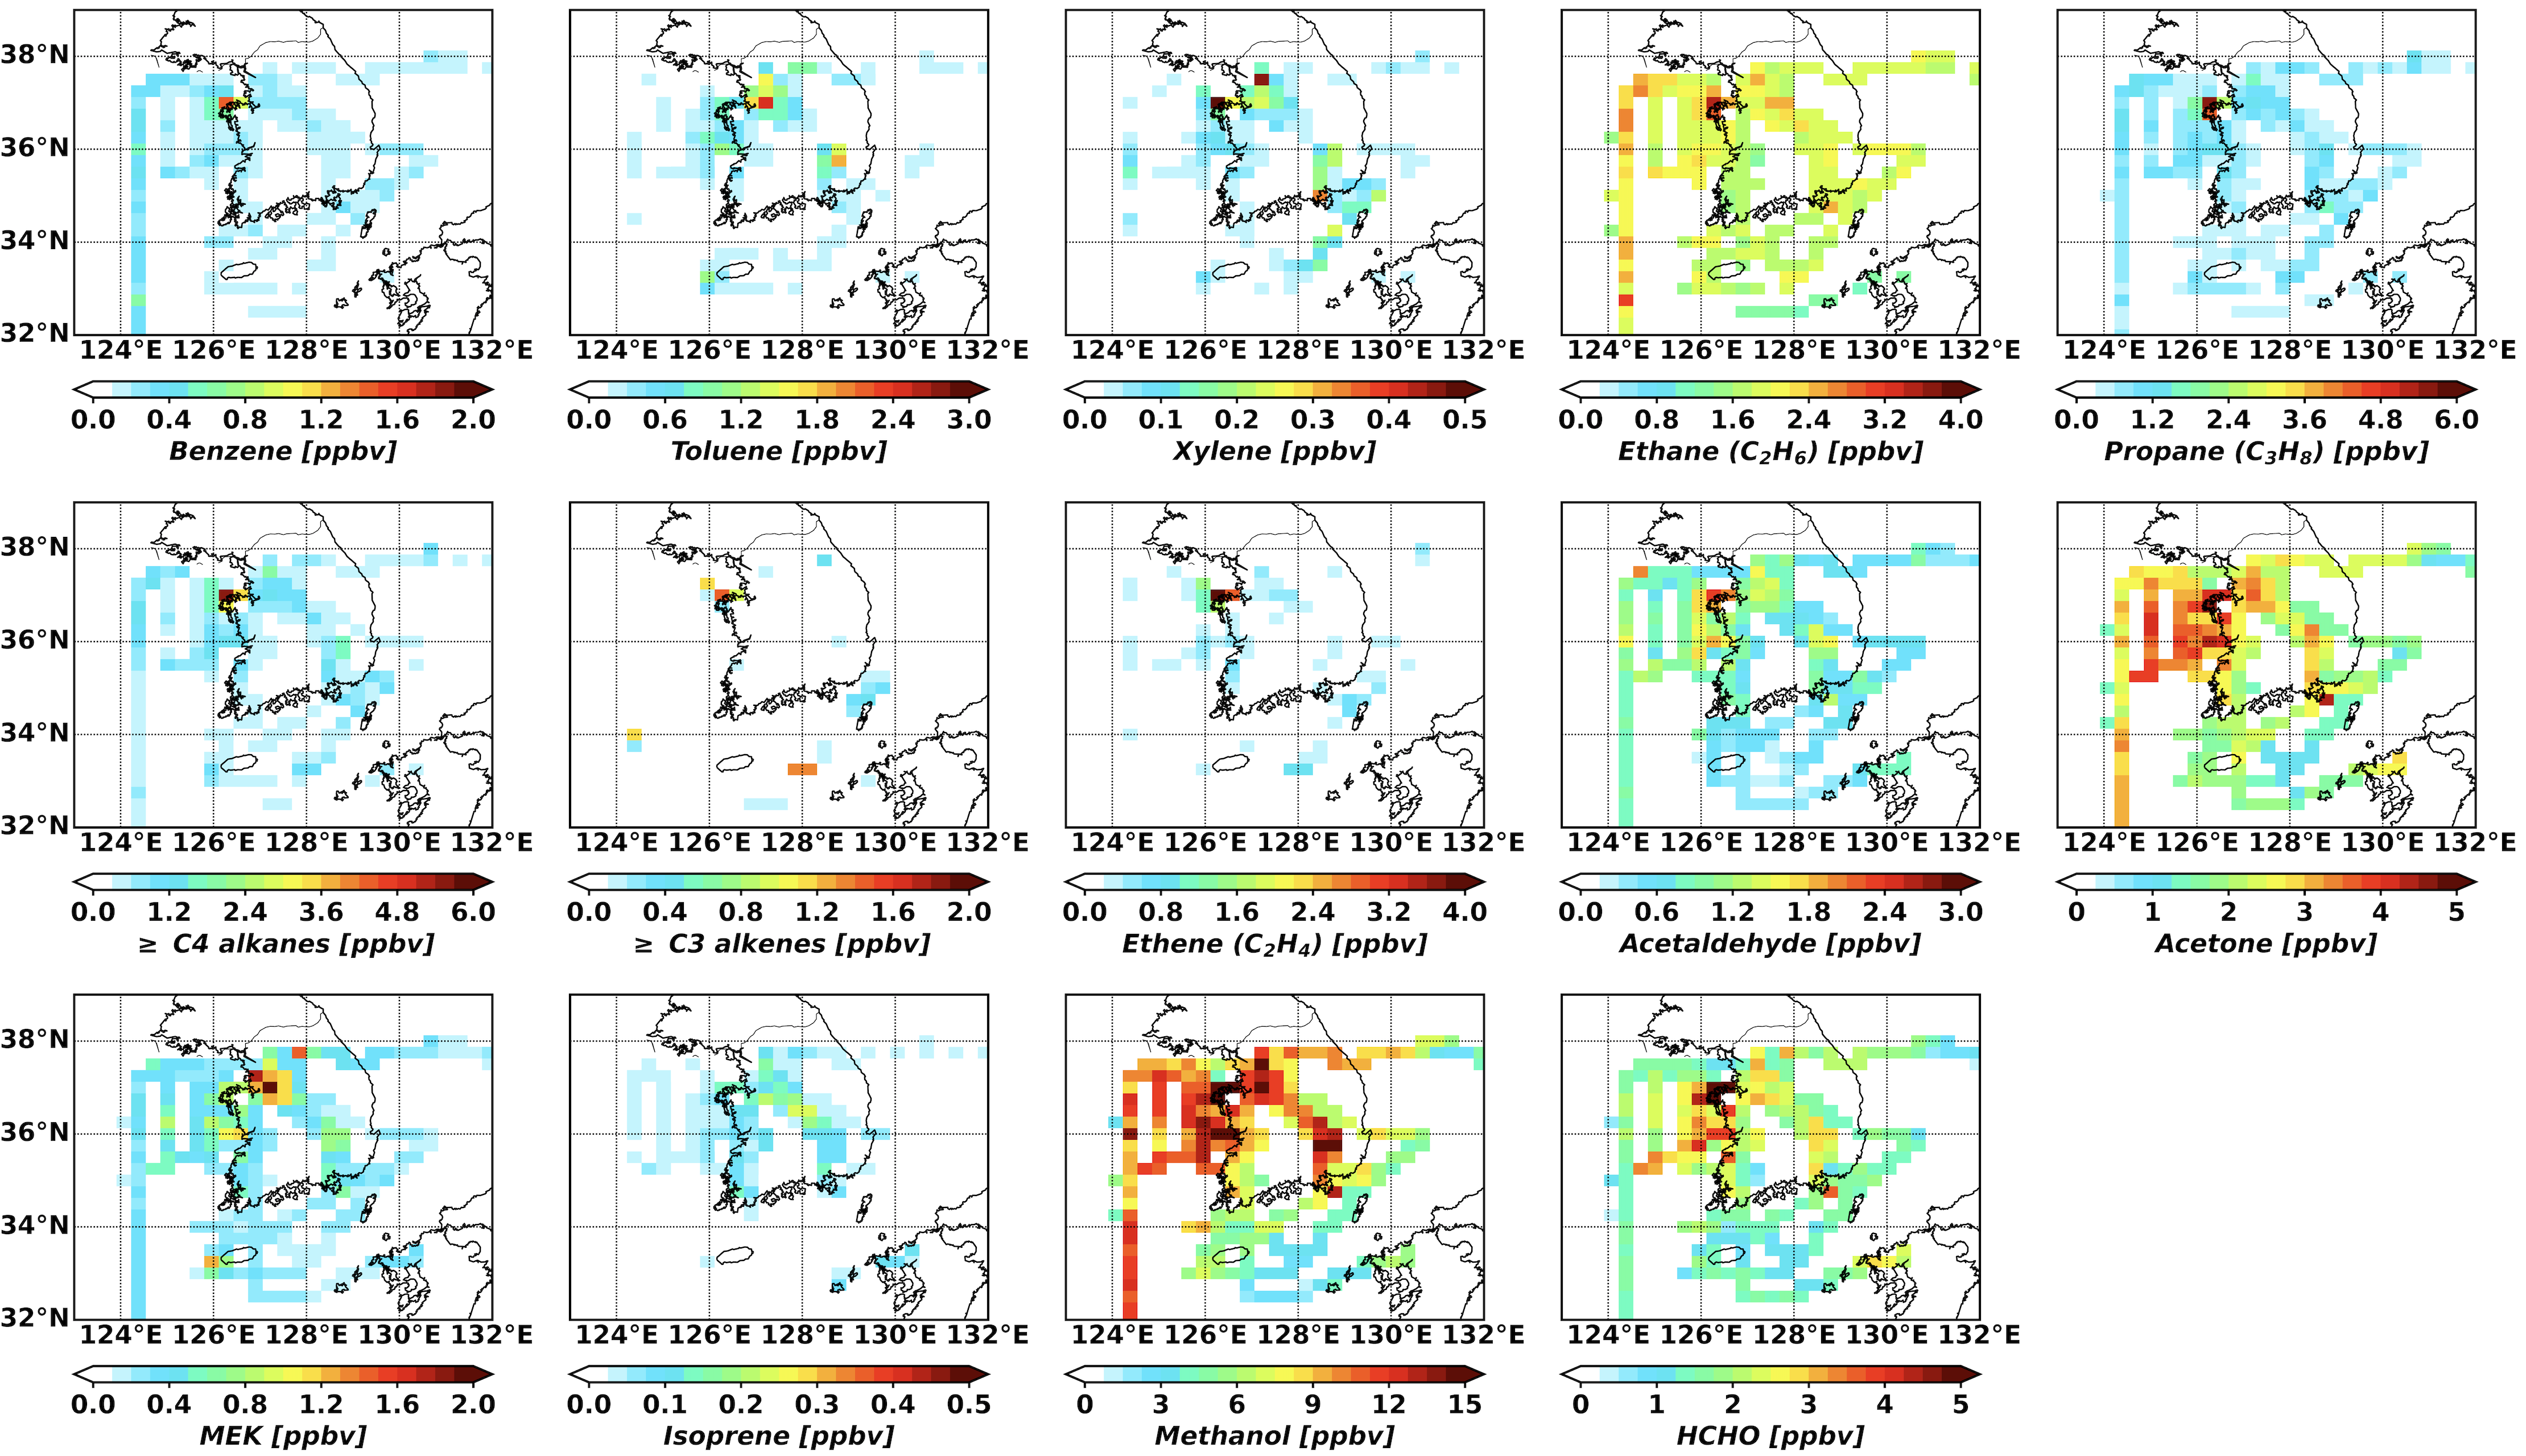


**Figure S1. Spatial distributions of VOC species in DC-8 observations below 2 km.**


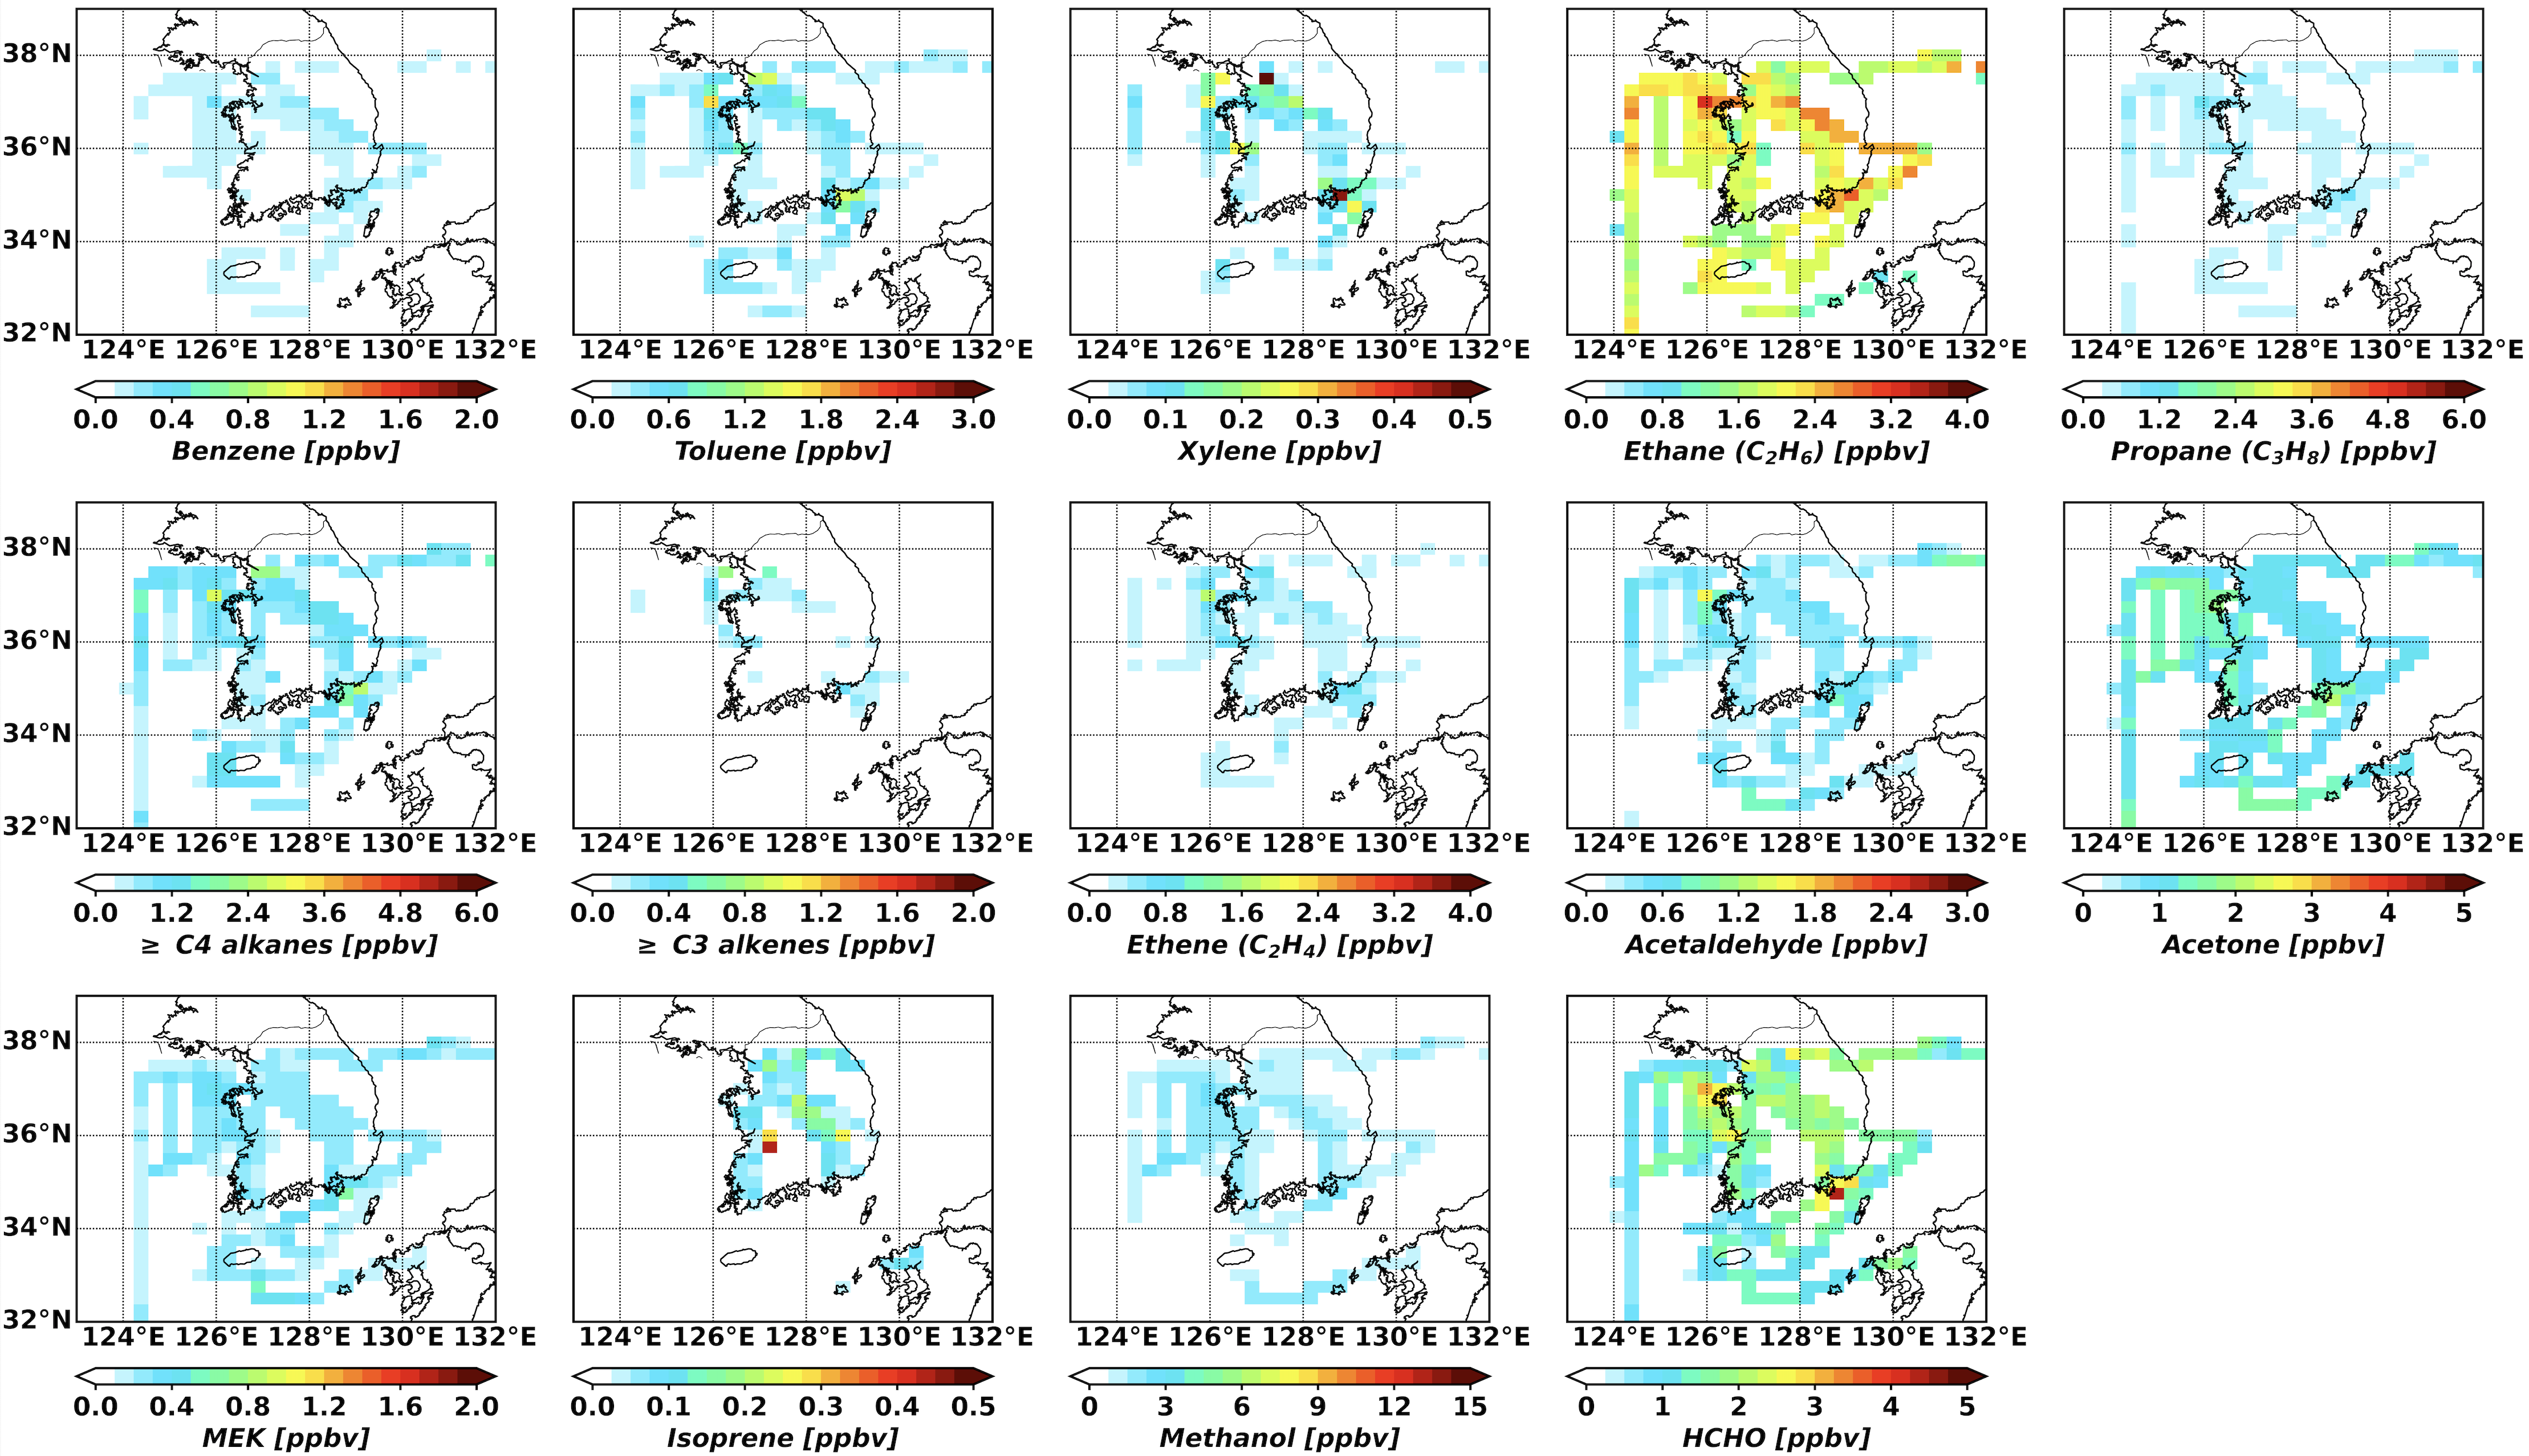


**Figure S2. Spatial distributions of VOC species in the model using the bottom-up inventory below 2km.**


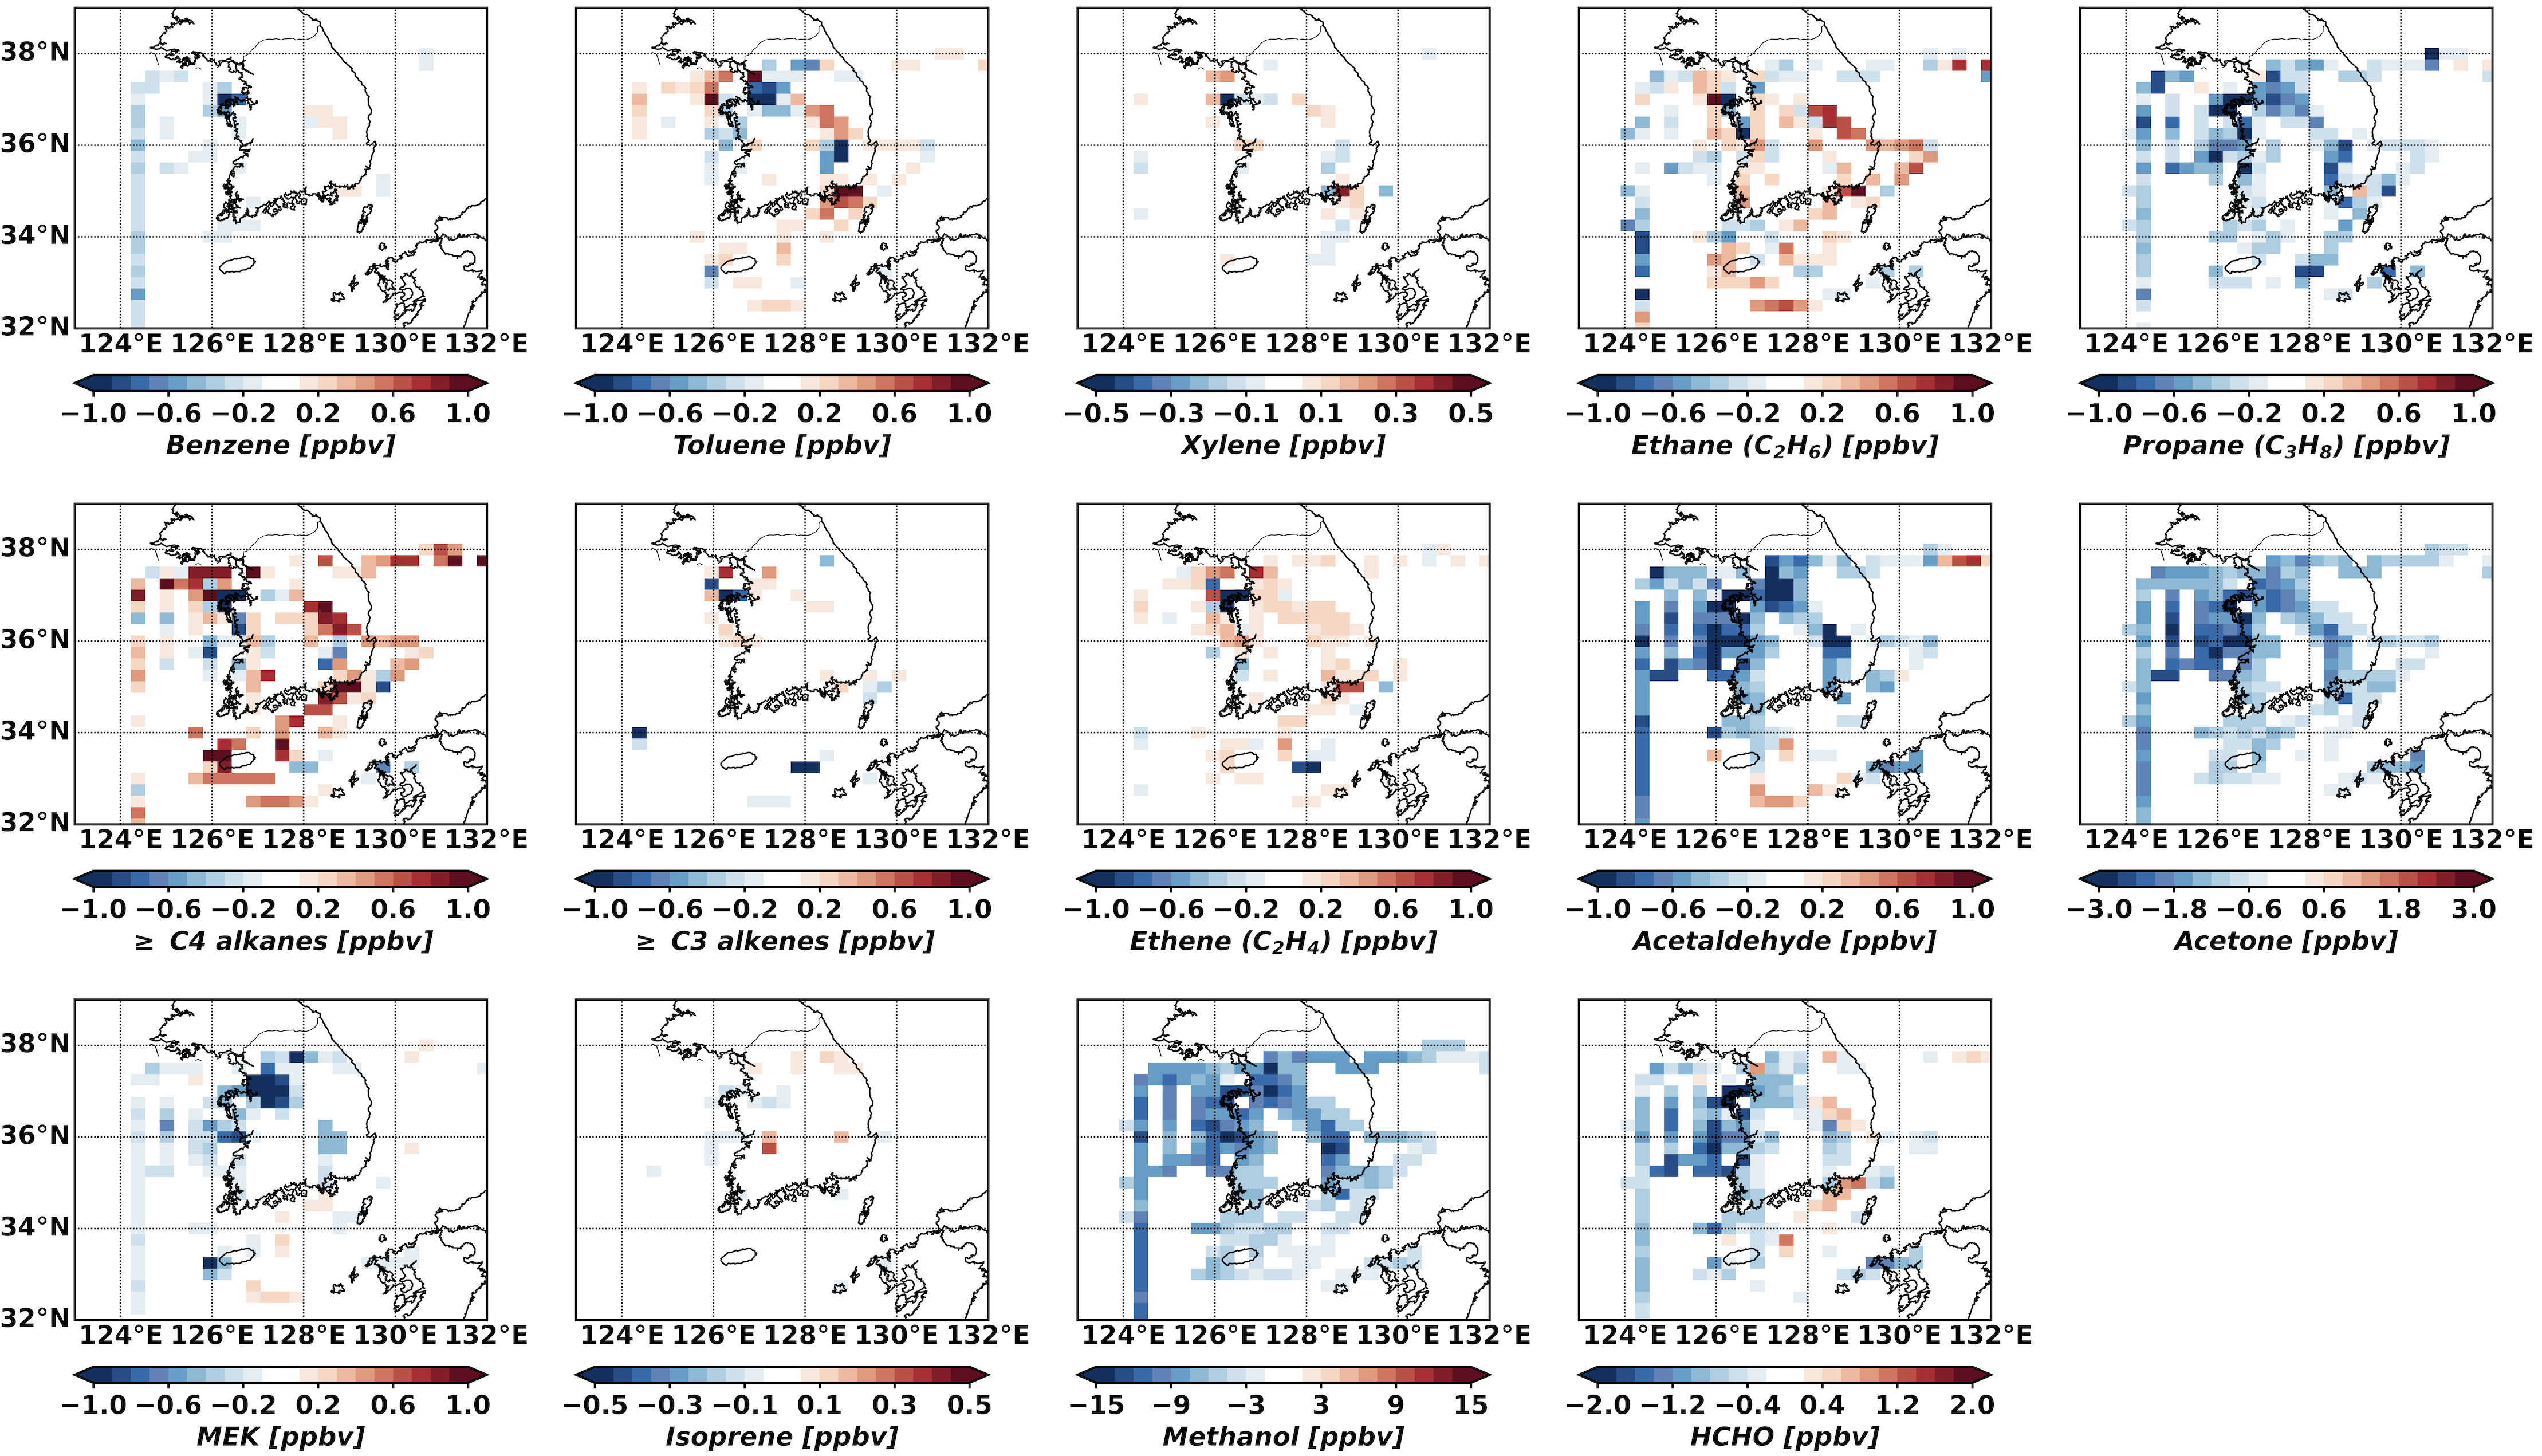


**Figure S3. Differences between the model and DC-8 (Fig. S2 – Fig. S1) below 2 km.**
